1 **Health Care Workers Knowledge, Attitudes, and Practice Towards Childhood**  
2 **Tuberculosis in Primary Health Facilities in Lusaka, Zambia.**

3

4

5 **Authors**

6 Paul Chabala Kaumba<sup>1</sup>, Mary Kagujje<sup>1</sup>, Chalilwe Chungu<sup>2</sup>, Sarah Nyangu<sup>1</sup>, Nsala Sanjase<sup>1</sup>,  
7 Minyoi Mubita Maimbolwa<sup>1</sup>, Brian Shuma<sup>1</sup>, Lophina Chilukutu<sup>1</sup>, Monde Muyoyeta<sup>1</sup>

8

9 **Institutions**

10 <sup>1</sup> Centre of Infectious Disease Research in Zambia (CIDRZ), Plot 34620, Corner of Lukasu  
11 and Danny Pule Roads, Mass Media. Lusaka, Zambia.

12 <sup>2</sup> Catholic Relief Services, Plot 377A Ibex, Lusaka.

13

14 **Corresponding author**

15 Paul Kaumba; CIDRZ, Tuberculosis Department, P. O. Box 34681, Lusaka, Zambia,  
16 Telephone: +260-977664404; email: paul.kaumba@cidrz.org

17

18 **Word count: 6220**

19

20

21 **NOTE: This preprint reports new research that has not been certified by peer review and should not be used to guide clinical practice.**

## 22 **Abstract**

### 23 BACKGROUND

24 Zambia is among the countries with high tuberculosis (TB) and Tuberculosis/Human  
25 Immunodeficiency Virus (TB/HIV) burdens, with a significant number of cases affecting  
26 children. However, a considerable portion of TB cases, especially in children, remains  
27 undiagnosed. This study aimed to assess and understand the factors influencing the knowledge,  
28 attitudes, and practices of health care workers (HCWs) regarding childhood TB in Zambia.

### 29 METHOD

30 Using a cross-sectional survey design, a self-administered anonymous questionnaire was  
31 employed to evaluate HCWs' knowledge, attitudes, and practices related to TB. The study was  
32 conducted at two primary health facilities in Lusaka, Zambia, between July and August 2020.  
33 The questionnaire data collected was later transcribed to an electronic system called DHIS 2.

### 34 RESULTS

35 Out of 238 participants, the majority (72.3%) were female HCWs. Most staff members across  
36 various departments demonstrated awareness of the primary TB symptom, which is coughing.  
37 However, approximately half of the participants had limited knowledge regarding the  
38 transmission of TB through oral activities such as singing and laughing. Furthermore, the study  
39 found that 21.4% of HCWs reported regular interaction with children in their daily work, while  
40 17.2% did not.

41 Among the HCWs, 73.1% referred children to the TB clinic to submit a sputum sample, 55.5%  
42 requested a sample from the patient, 55.9% expedited the process for children, 58.4% provided  
43 education on cough etiquette, and 42.4% recorded the child in the presumptive TB register.  
44 Only a negligible 0.8% of HCWs did not take any action for children exhibiting TB symptoms.

45 CONCLUSION

46 The study highlighted variations in knowledge levels based on gender, department, and training  
47 history among the HCWs. Those working in the TB department generally exhibited better  
48 knowledge and attitudes regarding TB, with a 50/50% variation. Therefore, it is crucial to  
49 enhance the TB knowledge, attitudes, and practices of female HCWs, who constitute most staff  
50 involved in TB diagnosis and treatment.

51 This study emphasizes the importance of improving the understanding of childhood TB among  
52 HCWs, particularly among female staff. Enhancing their knowledge and attitudes towards TB  
53 will contribute to early diagnosis and improved management of TB cases, ultimately reducing  
54 the burden of childhood TB in Zambia.

55 KEY WORDS

56 Knowledge, Attitudes, Practice, Tuberculosis (TB), Survey, Zambia

57

58

## 59 **Introduction**

60 Globally, an estimated 6,431,705 people developed tuberculosis in 2021 of which about 7%  
61 were children (1). Majority (about 96%) of children who died from TB were not on treatment  
62 (2). According to the World Health Organization (WHO), at least 10% of all TB notifications  
63 in high burden countries should be made to children under the age of 15(1). However, most  
64 high burden countries did not meet this goal, Zambia included. In the three years leading up to  
65 2022, Zambia reported approximately 40,000 annual cases of TB, with less than 10% of those  
66 cases being in children (1). According to estimates, the country missed 59 000 cases of  
67 tuberculosis in 2021, of which 5,500 were in children. (3)

68 Due to the pauci-bacillary nature of pediatric TB and its unique presentation in children,  
69 pediatric TB diagnosis can be difficult. (4-6) Variable knowledge, attitudes, and practices  
70 (KAP) concerning childhood TB among healthcare professionals are among  
71 the factors influencing the ineffective case detection of pediatric tuberculosis. In other settings,  
72 KAP studies on pediatric TB found that HCWs continue to hold stigmatizing beliefs and have  
73 misconceptions about TB diagnosis, treatment, and infection prevention (7-12). Even in light  
74 of new TB training, overall knowledge of the disease is insufficient (3, 5).

75 Children with symptoms of TB commonly present to primary healthcare facilities but due to  
76 limited capacity to recognize presumptive TB in children and due to the complexities of  
77 diagnosing childhood TB, (13) they are often referred from primary health facilities to referral  
78 hospitals and specialized pediatric units resulting in delayed diagnosis.(14) Optimizing the  
79 knowledge, attitudes, and practices (KAP) of health care workers, especially at primary health  
80 care level, is critical to early diagnosis and treatment of childhood TB.(15)

81

82 As far as we know, there is currently no local literature on KAP among health workers towards  
83 childhood TB in Zambia. We undertook a KAP study to identify potential health system  
84 barriers to childhood TB case detection. This data is intended to inform programmatic decision  
85 making on priority interventions towards improvement of childhood TB case detection.

## 86 **Methods**

### 87 **Study design and participants**

88 We conducted a cross-sectional study at two high volume primary health facilities in Lusaka,  
89 Zambia, Kanyama, and Chawama, between July 2020 and August 2020. Registered health care  
90 workers (nurse, clinical officer and medical officer) working at the health facility participated  
91 in the study. The main study population was made up of children between the ages 0-14  
92 presenting to intervention health facilities and house contacts of TB patients notified at  
93 Kanyama and Chawama. Chipata and Matero health facilities were Control Sites. Only TB case  
94 detection trends were observed from the control sites. The intervention sites are on average  
95 14km away from the control sites and this made for the expectation to minimise the risk of  
96 contamination.

### 97 **Data collection and study tools**

98 A paper-based structured questionnaire with 37 questions, adapted from multiple sources but  
99 customized to the Zambian setting, was self-administered by the health care workers (16). The  
100 Knowledge, Attitudes and Practices (KAP), questionnaire contained three sections divided  
101 into Knowledge, Attitudes and Practices. The questionnaire included questions on general  
102 demographic information including age, gender, profession, department, duration at facility,  
103 TB training history and length of training, knowledge of the participant, HCWs attitude and  
104 practices towards TB. Additionally, the questionnaire had 4 questions on TB awareness and  
105 sources of information.

106 Completed paper-based questionnaires were securely kept at the health facility with access  
107 limited to the study coordinators and the facility in-charge. The questionnaires were then  
108 captured into the DHIS 2-based electronic database by qualified research staff. The data  
109 extracted from DHIS 2 was secured under password-protected access systems identified by  
110 coded ID numbers only. Only de-identified data was stored on a secure server managed by  
111 CIDRZ.

### 112 **Statistical analysis**

113 All questions on knowledge were assigned an overall score of one point. Where a question had  
114 only one correct response, each correct answer was assigned one point and zero points were  
115 assigned for both incorrect and ‘don’t know/not sure’ answer. When a question had more than  
116 one correct response, each correct response contributed equal weight towards the overall score  
117 and each incorrect response carried no weight towards the overall score for the question. The  
118 points for each question were added together to create a composite knowledge score, ranging  
119 from 0 to 14. All Results of quantitative variables were reported as frequency (percentage %).

120 Descriptive analysis was done to describe the population and summarize the responses for  
121 sociodemographic information and for questions that had free text required of the respondents  
122 as part of the answers. The results were presented as frequencies and percentages; chi-squared  
123 test and Fisher’s exact test were used to compare groups as appropriate.

### 124 **Ethical considerations**

125 Approval for study implementation was obtained from the University of Zambia Biomedical  
126 Research Ethical Committee (UNZABREC), IRB Reference number 635-2020 under the TB  
127 REACH wave 7 study. The respondents provided written informed consent before being  
128 allowed to complete the paper based self-administered questionnaire. The survey protected the  
129 confidentiality of the respondents by maintaining anonymous responses.

130 **Results**

131 A total of 238 participants completed the surveys (giving a 100% response rate), and all 238  
132 were included in the analysis. The majority 151 (63.4%) were less than 30 years of age, 66  
133 (27.7%) were male, and 93 (39.1%) were from the Outpatient department (OPD) (Table 1).  
134 Most participants, 128 (53.8%), had been in employment for more than 1 year and less than  
135 half of the staff, 100 (42.0%) reported previous training in TB. Of those who had been  
136 previously trained, only 35 (35.0%) had been trained specifically on childhood TB. Sixty one  
137 percent (61%) of those trained had been trained within 1 year of conducting the survey.

138  
139  
140  
141  
142  
143  
144  
145  
146  
147  
148  
149  
150  
151  
152  
153  
154  
155  
156  
157  
158  
159  
160

161 *Table 1: Sociodemographic characteristics of HCWs*

| <b>Variables</b>                      | <b>Frequency (%)</b> |
|---------------------------------------|----------------------|
| <b>Age group</b>                      |                      |
| Under 30                              | 151 (63.4)           |
| 31-40                                 | 61 (25.6)            |
| 41-50                                 | 17 (7.1)             |
| Over 50                               | 7 (2.9)              |
| Unknown                               | 2 (0.8)              |
| <b>Sex</b>                            |                      |
| Male                                  | 66 (27.7)            |
| Female                                | 172 (72.3)           |
| <b>Department</b>                     |                      |
| Outpatient dept.                      | 93 (39.1)            |
| ART                                   | 27 (11.3)            |
| IPD                                   | 74 (31.1)            |
| MCH                                   | 38 (16.0)            |
| TB                                    | 4 (1.7)              |
| VMMC                                  | 1 (0.4)              |
| Unknown                               | 1 (0.4)              |
| <b>Duration employed</b>              |                      |
| Less than 1 year                      | 110 (46.2)           |
| Between 1-3 years                     | 92 (38.7)            |
| Between 3-5 years                     | 12 (5.0)             |
| Between 5-10 years                    | 15 (6.3)             |
| More than 10 years                    | 9 (3.8)              |
| <b>Training</b>                       |                      |
| Ever trained on TB                    | 100 (42.0)           |
| Adult TB                              | 47 (47.0)            |
| Childhood TB                          | 35 (35.0)            |
| TPT                                   | 40 (40.0)            |
| Infection Control                     | 29 (29.3)            |
| Case Finding                          | 12 (12.0)            |
| TB HIV                                | 53 (53.0)            |
| <b>How long ago were you trained?</b> |                      |
| < 3 months                            | 25 (25.0)            |
| ≥3 months - < 6 months                | 18 (18.0)            |
| Less than 1 year (≥6 months-≤1 year)  | 18 (18.0)            |
| ≥1 year to 3 years                    | 12 (12.0)            |
| ≥ 3 years                             | 27 (27.0)            |

162

163 Most of the staff were aware of the major TB symptoms (98.9%), with about half of the staff  
 164 showing little knowledge around the oral activities that can cause TB transmission; only 52.7%  
 165 of the OPD staff knew about the oral activity's (singing and laughing) ability to transmit TB.



166 All the staff responded that coughing spreads TB except 1 staff from OPD(Table 2). All the  
 167 respondents said that TB affects the lungs while 52.7% from OPD responded that it can also  
 168 affect the heart. All the TB clinic staff responded favorably to TB’s ability to affect the lungs,  
 169 heart, spine, meninges, lymph nodes, abdomen and pleura while 2 (50%) responded favorably  
 170 to TB’s ability to affect the larynx. The VMMC staff responded that lack of vaccination, HIV  
 171 infection, malnutrition and contact to TB patients are among the childhood TB infection risk  
 172 factors. However, they unfavorably responded to ‘being under 5 and a resident in Zambia,’  
 173 which are also TB risk factors.

174 *Table 2: Knowledge of HCWs on Tuberculosis*

| Variable                                       | Correct response (%)    |            |            |            |           |            |               |
|------------------------------------------------|-------------------------|------------|------------|------------|-----------|------------|---------------|
|                                                | Outpatient dept. (N=93) | ART (N=27) | IPD (N=74) | MCH (N=38) | TB (N=4)  | VMMC (N=1) | Unknown (N=1) |
| <b>Zambia is high burden TB</b>                |                         |            |            |            |           |            |               |
| Yes                                            | 92 (98.9)               | 27 (100.0) | 74 (100.0) | 38 (100.0) | 4 (100.0) | 1 (100.0)  | 1 (100.0)     |
| <b>How is TB spread? (Coughing)</b>            |                         |            |            |            |           |            |               |
| Coughing                                       | 92 (98.9)               | 27 (100.0) | 74 (100.0) | 38 (100.0) | 4 (100.0) | 1 (100.0)  | 1 (100.0)     |
| Sneezing                                       | 74 (79.6)               | 19 (70.4)  | 46 (62.2)  | 25 (65.8)  | 2 (50.0)  | 1 (100.0)  | 1 (100.0)     |
| Singing                                        | 49 (52.7)               | 7 (25.9)   | 18 (24.3)  | 14 (36.8)  | 2 (50.0)  | 0 (0.0)    | 0 (0.0)       |
| Laughing                                       | 49 (52.7)               | 6 (22.2)   | 20 (27.0)  | 12 (31.6)  | 2 (50.0)  | 0 (0.0)    | 0 (0.0)       |
| Skin contact                                   | 84 (90.3)               | 26 (96.3)  | 73 (98.6)  | 34 (89.5)  | 4 (100.0) | 1 (100.0)  | 1 (100.0)     |
| <b>TB can affect the following body parts?</b> |                         |            |            |            |           |            |               |
| Lungs                                          | 93 (100.0)              | 27 (100.0) | 74 (100.0) | 38 (100.0) | 4 (100.0) | 1 (100.0)  | 1 (100.0)     |
| Larynx                                         | 55 (59.1)               | 12 (44.4)  | 30 (40.5)  | 19 (50.0)  | 2 (50.0)  | 1 (100.0)  | 0 (0.0)       |
| Heart                                          | 49 (52.7)               | 14 (51.9)  | 21 (28.4)  | 12 (31.6)  | 4 (100.0) | 0 (0.0)    | 0 (0.0)       |
| Spine                                          | 88 (94.6)               | 24 (88.9)  | 68 (91.9)  | 34 (89.5)  | 4 (100.0) | 1 (100.0)  | 1 (100.0)     |
| Meninges                                       | 77 (82.8)               | 20 (74.1)  | 63 (85.1)  | 30 (78.9)  | 4 (100.0) | 1 (100.0)  | 1 (100.0)     |
| Lymph nodes                                    | 69 (74.2)               | 20 (74.1)  | 51 (68.9)  | 23 (60.5)  | 4 (100.0) | 1 (100.0)  | 1 (100.0)     |
| Abdomen                                        | 80 (86.0)               | 23 (85.2)  | 64 (86.5)  | 27 (71.1)  | 4 (100.0) | 1 (100.0)  | 1 (100.0)     |
| Pleura                                         | 71 (76.3)               | 17 (63.0)  | 42 (56.8)  | 20 (52.6)  | 4 (100.0) | 1 (100.0)  | 0 (0.0)       |
| <b>Risk factor for childhood TB infection</b>  |                         |            |            |            |           |            |               |
| Not being vaccinated with BCG                  | 82 (88.2)               | 24 (88.9)  | 68 (91.9)  | 35 (92.1)  | 1 (25.0)  | 1 (100.0)  | 1 (100.0)     |
| HIV                                            | 80 (86.0)               | 24 (88.9)  | 64 (86.5)  | 35 (92.1)  | 3 (75.0)  | 1 (100.0)  | 1 (100.0)     |
| Malnutrition                                   | 75 (80.6)               | 23 (85.2)  | 59 (79.7)  | 35 (92.1)  | 3 (75.0)  | 1 (100.0)  | 1 (100.0)     |
| Being less than 5 years old                    | 58 (62.4)               | 15 (55.6)  | 38 (51.4)  | 17 (44.7)  | 2 (50.0)  | 1 (100.0)  | 0 (0.0)       |
| Living in Zambia                               | 31 (33.3)               | 3 (11.1)   | 25 (33.8)  | 9 (23.7)   | 2 (50.0)  | 0 (0.0)    | 0 (0.0)       |
| Being a contact to a TB case                   | 79 (84.9)               | 26 (96.3)  | 60 (81.1)  | 34 (89.5)  | 3 (75.0)  | 1 (100.0)  | 1 (100.0)     |

175

176 Table 3 shows that 51 (21.4%) of the HCWs spent every day with children while 41(17.2%)  
177 indicated to have no contact with children. Of the 238 HCWs ,174 (73.1%) refer the children  
178 to the TB clinic to submit a sputum sample. Additionally, 132 (55.5%) request the patient for  
179 a sample, 133 (55.9%) fast track the children, 139 (58.4%) provide education on cough  
180 etiquette and 101 (42.4%) record the child in the presumptive TB register. Only 2 (0.8%) of  
181 the HCWs said they do nothing about children with TB symptoms. Most of the HCW  
182 responded that they use GeneXpert as a reliable test to diagnose TB in Children while 11 (4.6%)  
183 indicated no knowledge on the test to use. Most HCWs 187 (78.6%) indicated they use gastric  
184 aspirates to collect sputum samples.

185

186

187

188

189

190

191

192

193

194

195

196

197 *Table 3: Practices of HCWs on Childhood TB*

| Practice                                                                                       | Frequency n=238 (%) |
|------------------------------------------------------------------------------------------------|---------------------|
| <b>How often do you interact with children with symptoms suggestive of TB?</b>                 |                     |
| Everyday                                                                                       | 51 (21.4)           |
| More than once a week                                                                          | 42 (17.6)           |
| At least once a week                                                                           | 49 (20.6)           |
| Once a month                                                                                   | 48 (20.2)           |
| Never                                                                                          | 41 (17.2)           |
| Unknown                                                                                        | 7 (2.9)             |
| <b>What do you do when you identify a child with symptoms of TB? (True responses)</b>          |                     |
| Ask the patient to go to TB corner to submit a sputum sample                                   | 174 (73.1)          |
| Request the patient to submit a sputum sample                                                  | 132 (55.5)          |
| Fast track the child                                                                           | 133 (55.9)          |
| Provide education on cough etiquette                                                           | 139 (58.4)          |
| Document the child in the presumptive TB register                                              | 101 (42.4)          |
| Nothing                                                                                        | 2 (0.8)             |
| <b>Which test do you often rely on to diagnose TB in children?</b>                             |                     |
| Sputum microscopy                                                                              | 39 (16.4)           |
| Gene Xpert                                                                                     | 114 (47.9)          |
| Chest X-ray                                                                                    | 47 (19.7)           |
| LAM                                                                                            | 12 (5.0)            |
| Culture and DST                                                                                | 12 (5.0)            |
| Other                                                                                          | 2 (0.8)             |
| N/A                                                                                            | 1 (0.4)             |
| Unknown                                                                                        | 11 (4.6)            |
| <b>What do you do for children not able to produce sputum?</b>                                 |                     |
| Prescribe antibiotics for 1 week and then ask them to return to the health facility for review | 18 (7.6)            |
| Collect gastric aspirates                                                                      | 187 (78.6)          |
| Use chest x-ray to make a diagnosis                                                            | 122 (51.3)          |
| Give mother sputum bottle to continue trying to get sputum from the child                      | 36 (15.1)           |
| Request for LAM                                                                                | 52 (21.8)           |
| Other                                                                                          | 5 (2.1)             |
| N/A                                                                                            | 1 (0.4)             |

198

199 The results further showed a strong association between TB knowledge and the department  
 200 where staff worked.

201 Table 4: HCWs characteristics and knowledge level on TB Infection Control

202 below shows the characteristics and knowledge levels of healthcare workers on TB infection  
 203 control. ART department staff had lower knowledge of TB, evidenced by 17 (63%) respondents

204 giving incorrect answers to questions about TB infection control, versus 1 (3.7%) respondent  
 205 who gave correct answers, and 9 (33.3%) respondents who did not respond to the questions  
 206 about infection control. In the TB clinic, 2 (50%) respondents gave the correct responses, while  
 207 2(50%) gave the incorrect ones. Additionally, the OPD/IPD HCWs had 42 (25.1%) wrong  
 208 responses compared to 21 (12.6%) correct responses with majority 104 (62.3%) not giving  
 209 responses to the questions. The findings showed that there was no association between TB  
 210 infection control knowledge, Age and Sex. However, there was a close association ( $p=0.07$ )  
 211 between TB infection control knowledge and the duration of employment.

212 *Table 4: HCWs characteristics and knowledge level on TB Infection Control*

| HCWs' characteristics                                  | TB Infection Control Knowledge level |             |                 | p-value |
|--------------------------------------------------------|--------------------------------------|-------------|-----------------|---------|
|                                                        | Bad (n=70)                           | Good (n=29) | Unknown (n=139) |         |
| <b>Age group</b>                                       |                                      |             |                 |         |
| Under 30                                               | 40 (26.5)                            | 18 (11.9)   | 93 (61.6)       | 0.21    |
| 31-40                                                  | 23 (37.7)                            | 5 (8.2)     | 33 (54.1)       |         |
| 41-50                                                  | 6 (35.3)                             | 3 (17.6)    | 8 (47.1)        |         |
| Over 50                                                | 1 (14.3)                             | 3 (42.9)    | 3 (42.9)        |         |
| Unknown                                                | 0 (0.0)                              | 0 (0.0)     | 2 (100.0)       |         |
| <b>Age (Median, IQR) (Under 30, Under 30 to 31-40)</b> |                                      |             |                 |         |
| <b>Sex</b>                                             |                                      |             |                 |         |
| Male                                                   | 25 (37.9)                            | 9 (13.6)    | 32 (48.5)       | 0.14    |
| Female                                                 | 45 (26.2)                            | 20 (11.6)   | 107 (62.2)      |         |
| <b>Department</b>                                      |                                      |             |                 |         |
| Outpatient dept./IPD                                   | 42 (25.1)                            | 21 (12.6)   | 104 (62.3)      | 0.00*   |
| ART                                                    | 17 (63.0)                            | 1 (3.7)     | 9 (33.3)        |         |
| MCH                                                    | 9 (23.7)                             | 4 (10.5)    | 25 (65.8)       |         |
| TB                                                     | 2 (50.0)                             | 2 (50.0)    | 0 (0.0)         |         |
| VMMC                                                   | 0 (0.0)                              | 0 (0.0)     | 1 (100.0)       |         |
| Unknown                                                | 0 (0.0)                              | 1 (100.0)   | 0 (0.0)         |         |
| <b>Duration employed</b>                               |                                      |             |                 |         |
| Less than 1 year                                       | 25 (22.7)                            | 14 (12.7)   | 71 (64.5)       | 0.07    |
| Between 1-3 years                                      | 34 (37.0)                            | 8 (8.7)     | 50 (54.3)       |         |
| Between 5-3 years                                      | 4 (33.3)                             | 1 (8.3)     | 7 (58.3)        |         |
| Between 5-10 years                                     | 4 (26.7)                             | 2 (13.3)    | 9 (60.0)        |         |
| More than 10 years                                     | 3 (33.3)                             | 4 (44.4)    | 2 (22.2)        |         |

\* P value <0.05

213 **The HealthCare Worker's KAP Scores**

214 The characteristics and scores of healthcare workers in each category of the Knowledge,  
215 Attitudes, and Practices (KAP) survey are presented in Table 6: HCWs characteristics and  
216 knowledge score below and in Table 5: Detailed HCWs characteristics and knowledge score of the  
217 supplementary data. Knowledge was subdivided further into Epidemiology, Diagnosis, and  
218 Treatment. The results revealed that, older HCWs (Over 50 years old) scored the highest on  
219 the KAP for Knowledge (9.6; 68.6%), Attitude (2.4; 80%), and Practices (1.2; 60%) whereas  
220 the staff members who did not provide their Age group scored the lowest. Male participants  
221 scored higher than female participants: males scored knowledge 8.8 (62.9%), attitudes 2.6  
222 (86.7%), practices 1.1 (55%) and females 8.3 (59.3%) knowledge, 2.3 (76.7%) attitudes, 0.8  
223 (40%) practices.

| HCWs' characteristic variable | Knowledge                     |       |                 |       |                 |       | Knowledge Score  |       | Attitudes       |       | Practices       |       | Total            |       |
|-------------------------------|-------------------------------|-------|-----------------|-------|-----------------|-------|------------------|-------|-----------------|-------|-----------------|-------|------------------|-------|
|                               | Epidemiology and transmission |       | Diagnosis       |       | Treatment       |       | Maximum Score=14 | %     | Maximum Score=3 | %     | Maximum score=2 | %     | Maximum score=19 | %     |
|                               | Maximum Score=4               | %     | Maximum score=2 | %     | Maximum score=8 | %     |                  |       |                 |       |                 |       |                  |       |
| <b>Age group</b>              |                               |       |                 |       |                 |       |                  |       |                 |       |                 |       |                  |       |
| Under 30                      | 2.9                           | 72.5% | 1               | 50.0% | 4.5             | 56.3% | 8.4              | 60.0% | 2.4             | 80.0% | 0.9             | 45.0% | 11.7             | 61.6% |
| 31-40                         | 2.7                           | 67.5% | 1.1             | 55.0% | 4.7             | 58.8% | 8.5              | 60.7% | 2.4             | 80.0% | 0.9             | 45.0% | 11.8             | 62.1% |
| 41-50                         | 2.7                           | 67.5% | 1.1             | 55.0% | 4.6             | 57.5% | 8.4              | 60.0% | 2.3             | 76.7% | 0.9             | 45.0% | 11.6             | 61.1% |
| Over 50                       | 3.2                           | 80.0% | 1.3             | 65.0% | 5.1             | 63.8% | 9.6              | 68.6% | 2.4             | 80.0% | 1.2             | 60.0% | 13.2             | 69.5% |
| Unknown                       | 3.2                           | 80.0% | 1.2             | 60.0% | 3.5             | 43.8% | 7.9              | 56.4% | 2.3             | 76.7% | 0.5             | 25.0% | 10.7             | 56.3% |
| <b>Sex</b>                    |                               |       |                 |       |                 |       |                  |       |                 |       |                 |       |                  |       |
| Male                          | 2.9                           | 72.5% | 1.1             | 55.0% | 4.8             | 60.0% | 8.8              | 62.9% | 2.6             | 86.7% | 1.1             | 55.0% | 12.5             | 65.8% |
| Female                        | 2.8                           | 70.0% | 1               | 50.0% | 4.5             | 56.3% | 8.3              | 59.3% | 2.3             | 76.7% | 0.8             | 40.0% | 11.4             | 60.0% |
| <b>Department</b>             |                               |       |                 |       |                 |       |                  |       |                 |       |                 |       |                  |       |
| Outpatient dept.              | 3                             | 75.0% | 1               | 50.0% | 4.7             | 58.8% | 8.7              | 62.1% | 2.5             | 83.3% | 0.8             | 40.0% | 12               | 63.2% |
| ART                           | 2.7                           | 67.5% | 1.1             | 55.0% | 5.3             | 66.3% | 9.1              | 65.0% | 2.5             | 83.3% | 0.6             | 30.0% | 12.2             | 64.2% |
| IPD                           | 2.7                           | 67.5% | 1               | 50.0% | 4.1             | 51.3% | 7.8              | 55.7% | 2.4             | 80.0% | 0.9             | 45.0% | 11.1             | 58.4% |
| MCH                           | 2.6                           | 65.0% | 0.9             | 45.0% | 4.4             | 55.0% | 7.9              | 56.4% | 2.1             | 70.0% | 0.9             | 45.0% | 10.9             | 57.4% |
| TB                            | 3.2                           | 80.0% | 1.7             | 85.0% | 6.7             | 83.8% | 11.6             | 82.9% | 2.6             | 86.7% | 1.7             | 85.0% | 15.9             | 83.7% |
| VMMC                          | 1.9                           | 47.5% | 1               | 50.0% | 4.6             | 57.5% | 7.5              | 53.6% | 2.4             | 80.0% | 0.9             | 45.0% | 10.8             | 56.8% |
| Unknown                       | 2.7                           | 67.5% | 1               | 50.0% | 3.8             | 47.5% | 7.5              | 53.6% | 2.7             | 90.0% | 1               | 50.0% | 11.2             | 58.9% |
| <b>Duration employed</b>      |                               |       |                 |       |                 |       |                  |       |                 |       |                 |       |                  |       |
| Less than 1 year              | 2.7                           | 67.5% | 1               | 50.0% | 4.5             | 56.3% | 8.2              | 58.6% | 2.3             | 76.7% | 0.8             | 40.0% | 11.3             | 59.5% |
| Between 1-3 years             | 2.9                           | 72.5% | 1.1             | 55.0% | 4.8             | 60.0% | 8.8              | 62.9% | 2.5             | 83.3% | 0.9             | 45.0% | 12.2             | 64.2% |
| Between 3-5 years             | 2.6                           | 65.0% | 1.1             | 55.0% | 4.6             | 57.5% | 8.3              | 59.3% | 2.4             | 80.0% | 1.1             | 55.0% | 11.8             | 62.1% |
| Between 5-10 years            | 2.5                           | 62.5% | 1.1             | 55.0% | 4.1             | 51.3% | 7.7              | 55.0% | 2.4             | 80.0% | 1.1             | 55.0% | 11.2             | 58.9% |
| More than 10 years            | 2.9                           | 72.5% | 0.9             | 45.0% | 4.9             | 61.3% | 8.7              | 62.1% | 2.3             | 76.7% | 1.1             | 55.0% | 12.1             | 63.7% |
| Unknown                       | 2.6                           | 65.0% | 1               | 50.0% | 4.6             | 57.5% | 8.4              | 60.0% | 2.5             | 83.3% | 0.9             | 45.0% | 11.8             | 62.1% |
| <b>Ever trained on TB</b>     |                               |       |                 |       |                 |       |                  |       |                 |       |                 |       |                  |       |

|                     |     |       |     |       |     |       |     |       |     |       |     |       |      |       |
|---------------------|-----|-------|-----|-------|-----|-------|-----|-------|-----|-------|-----|-------|------|-------|
| No                  | 2.7 | 67.5% | 1   | 50.0% | 4.2 | 52.5% | 7.9 | 56.4% | 2.3 | 76.7% | 0.8 | 40.0% | 11   | 57.9% |
| Yes                 | 2.9 | 72.5% | 1.1 | 55.0% | 5.1 | 63.8% | 9.1 | 65.0% | 2.5 | 83.3% | 1   | 50.0% | 12.6 | 66.3% |
| Unknown             | 2.6 | 65.0% | 0.9 | 45.0% | 4.3 | 53.8% | 7.8 | 55.7% | 2.5 | 83.3% | 0.9 | 45.0% | 11.2 | 58.9% |
| <b>Childhood TB</b> |     | 0.0%  |     |       |     |       |     |       |     |       |     |       |      |       |
| No                  | 2.9 | 72.5% | 1   | 50.0% | 4.9 | 61.3% | 8.8 | 62.9% | 2.5 | 83.3% | 0.9 | 45.0% | 12.2 | 64.2% |
| Yes                 | 3   | 75.0% | 1.4 | 70.0% | 5.4 | 67.5% | 9.8 | 70.0% | 2.4 | 80.0% | 1.1 | 55.0% | 13.3 | 70.0% |

226

227 In terms of departmental differences, the TB department staff scored the highest KAP (11.6  
228 (82.9%), 2.6 (86.7%), and 1.7 (85%)), whereas the staff from the other departments scored  
229 consistently low for knowledge and practice but higher on attitudes. For instance, the KAP for  
230 OPDs was (8.7 (62.1%), 2.5 (83.3%), and 0.8 (40%)), with a high score for attitudes and a low  
231 score for knowledge and practices.

232 The HCWs who had been employed longer than three years scored the highest in practice (1.1  
233 (55%)), followed by those employed between one and three years (0.9 (45%)) and those  
234 employed less than one year (0.8 (40%)). The scores for knowledge and attitudes ranged  
235 between 2.3 (76.7%) and 2.5 (83.3%) for attitude and between 8.3 (59.3%) and 8.8 (62.9%) for  
236 knowledge, except for the 5-10 years disaggregate, which scored 7.7 (55.0%).

237 Those who received childhood TB training performed better than those who did not. Those  
238 who had previously received childhood TB training had a KAP of 9.8 (70%), 2.4 (80%), and  
239 1.1 (55%) compared to KAP of 8.8 (62.9%), 2.5 (83.3%), and 0.9 (45.0%) for those not  
240 previously trained.



243 *Table 6: HCWs characteristics and knowledge score*

| HCWs' characteristic variable | Knowledge Score  |       | Attitudes       |       | Practices       |       | Total            |       |
|-------------------------------|------------------|-------|-----------------|-------|-----------------|-------|------------------|-------|
|                               | Maximum Score=14 | %     | Maximum Score=3 | %     | Maximum score=2 | %     | Maximum score=19 | %     |
| <b>Age group</b>              |                  |       |                 |       |                 |       |                  |       |
| Under 30                      | 8.4              | 60.0% | 2.4             | 80.0% | 0.9             | 45.0% | 11.7             | 61.6% |
| 31-40                         | 8.5              | 60.7% | 2.4             | 80.0% | 0.9             | 45.0% | 11.8             | 62.1% |
| 41-50                         | 8.4              | 60.0% | 2.3             | 76.7% | 0.9             | 45.0% | 11.6             | 61.1% |
| Over 50                       | 9.6              | 68.6% | 2.4             | 80.0% | 1.2             | 60.0% | 13.2             | 69.5% |
| Unknown                       | 7.9              | 56.4% | 2.3             | 76.7% | 0.5             | 25.0% | 10.7             | 56.3% |
| <b>Sex</b>                    |                  |       |                 |       |                 |       |                  |       |
| Male                          | 8.8              | 62.9% | 2.6             | 86.7% | 1.1             | 55.0% | 12.5             | 65.8% |
| Female                        | 8.3              | 59.3% | 2.3             | 76.7% | 0.8             | 40.0% | 11.4             | 60.0% |
| <b>Department</b>             |                  |       |                 |       |                 |       |                  |       |
| Outpatient dept.              | 8.7              | 62.1% | 2.5             | 83.3% | 0.8             | 40.0% | 12               | 63.2% |
| ART                           | 9.1              | 65.0% | 2.5             | 83.3% | 0.6             | 30.0% | 12.2             | 64.2% |
| IPD                           | 7.8              | 55.7% | 2.4             | 80.0% | 0.9             | 45.0% | 11.1             | 58.4% |
| MCH                           | 7.9              | 56.4% | 2.1             | 70.0% | 0.9             | 45.0% | 10.9             | 57.4% |
| TB                            | 11.6             | 82.9% | 2.6             | 86.7% | 1.7             | 85.0% | 15.9             | 83.7% |
| VMMC                          | 7.5              | 53.6% | 2.4             | 80.0% | 0.9             | 45.0% | 10.8             | 56.8% |
| Unknown                       | 7.5              | 53.6% | 2.7             | 90.0% | 1               | 50.0% | 11.2             | 58.9% |
| <b>Duration employed</b>      |                  |       |                 |       |                 |       |                  |       |
| Less than 1 year              | 8.2              | 58.6% | 2.3             | 76.7% | 0.8             | 40.0% | 11.3             | 59.5% |
| Between 1-3 years             | 8.8              | 62.9% | 2.5             | 83.3% | 0.9             | 45.0% | 12.2             | 64.2% |
| Between 3-5 years             | 8.3              | 59.3% | 2.4             | 80.0% | 1.1             | 55.0% | 11.8             | 62.1% |
| Between 5-10 years            | 7.7              | 55.0% | 2.4             | 80.0% | 1.1             | 55.0% | 11.2             | 58.9% |
| More than 10 years            | 8.7              | 62.1% | 2.3             | 76.7% | 1.1             | 55.0% | 12.1             | 63.7% |
| Unknown                       | 8.4              | 60.0% | 2.5             | 83.3% | 0.9             | 45.0% | 11.8             | 62.1% |
| <b>Ever trained on TB</b>     |                  |       |                 |       |                 |       |                  |       |
| No                            | 7.9              | 56.4% | 2.3             | 76.7% | 0.8             | 40.0% | 11               | 57.9% |
| Yes                           | 9.1              | 65.0% | 2.5             | 83.3% | 1               | 50.0% | 12.6             | 66.3% |
| Unknown                       | 7.8              | 55.7% | 2.5             | 83.3% | 0.9             | 45.0% | 11.2             | 58.9% |
| <b>Childhood TB</b>           |                  |       |                 |       |                 |       |                  |       |
| No                            | 8.8              | 62.9% | 2.5             | 83.3% | 0.9             | 45.0% | 12.2             | 64.2% |
| Yes                           | 9.8              | 70.0% | 2.4             | 80.0% | 1.1             | 55.0% | 13.3             | 70.0% |

244

245 The Table 7: Descriptive variables of HCWs KAP in the supplementary data summarizes the

246 characteristics of the HCWs. The largest number of HCWs that took part in the study were

247 nurses (168 (70.3%)) followed by clinical officers (53(22.2%)), then medical doctors  
 248 (17(7.1%)) and (1(0.4%)) HCW did not indicate their profession.

249 *Table 7: Descriptive variables of HCWs KAP*

| <b>Summarization of qualitative characteristics</b>    |                 |
|--------------------------------------------------------|-----------------|
| <b>Variable (n=238)</b>                                | <b>Freq (%)</b> |
| <b>Profession</b>                                      |                 |
| Nurse                                                  | 168(70.3)       |
| Clinical officer                                       | 53(22.2)        |
| Medical Doctor                                         | 17 (7.1)        |
| Unknown                                                | 1 (0.4)         |
| <b>Childhood TB closest feeling</b>                    |                 |
| Compassionate and desire to help                       | 231 (96.7)      |
| Compassionate but stay away                            | 1 (0.4)         |
| It's their problem, can't get TB                       | 0               |
| I fear them, they may infect me                        | 1 (0.4)         |
| No particular feeling                                  | 1 (0.4)         |
| Other                                                  | 1 (0.4)         |
| Unknown                                                | 4 (1.7)         |
| <b>Reaction to work at TB corner</b>                   |                 |
| Refuse                                                 | 2 (0.8)         |
| Don't mind                                             | 138 (57.7)      |
| Scared                                                 | 9 (3.8)         |
| Angry                                                  | 2 (0.8)         |
| Happy                                                  | 77 (32.2)       |
| Other                                                  | 7 (2.9)         |
| Unknown                                                | 4 (1.7)         |
| <b>Biggest fear about TPT</b>                          |                 |
| Pill burden                                            | 69 (28.9)       |
| Promotes DR-TB                                         | 42 (17.6)       |
| No benefit in high burden setting                      | 3 (1.3)         |
| Side effects                                           | 109 (45.6)      |
| Other                                                  | 5 (2.1)         |
| Unknown                                                | 11 (4.6)        |
| <b>How often interact with TB symptomatic children</b> |                 |
| Everyday                                               | 51 (21.3)       |
| More than once a week                                  | 42 (17.6)       |
| At least once a week                                   | 49 (20.5)       |
| Once a month                                           | 48 (20.1)       |
| Never                                                  | 41 (17.2)       |
| Unknown                                                | 8 (3.4)         |
| <b>Often relied on test</b>                            |                 |
| Sputum microscopy                                      | 39 (16.3)       |
| Gene Xpert                                             | 114 (47.7)      |
| Chest X-ray                                            | 47 (19.7)       |

|                                              |            |
|----------------------------------------------|------------|
| LAM                                          | 12 (5.0)   |
| Culture and DST                              | 12 (5.0)   |
| Other                                        | 2 (0.8)    |
| N/A                                          | 1 (0.4)    |
| Unknown                                      | 12 (5.0)   |
| <b>Feel well informed about TB</b>           |            |
| No                                           | 128 (53.6) |
| Yes                                          | 103 (43.1) |
| Unknown                                      | 8 (3.4)    |
| <b>Wish to get more information about TB</b> |            |
| No                                           | 0          |
| Yes                                          | 234 (97.9) |
| Unknown                                      | 5 (2.1)    |

250

251 With regards diagnosis, 47.7 % of the HCWs indicated they rely on GeneXpert for TB  
 252 diagnosis whereas 16.3%, 19.7% and 5.0% relied on Microscopy, Chest Xray and LAM  
 253 respectively. Only 2 (0.8%) health care workers specified they did not know which test to use.

254 Majority of the healthcare workers 231 (96.7%) indicated feeling compassionate and desire to  
 255 help children with TB whereas 1(0.4%) felt indifferent, another 1(0.4%) fear being infected by  
 256 them and 1(0.4%) indicated feeling compassionate but tends to stay away from childhood TB  
 257 patients.

258 When asked about their reaction if asked to work with Childhood TB, over fifty percent  
 259 (138(57.7%)) indicated they didn't mind, 77 (32.2%) responded that they'd be happy to work  
 260 with children who have TB, 2 (0.8%) responded that they would refuse and wouldn't be happy.

261 When asked about their biggest fear on TPT, most (109(45.6%)) of the HCWs specified the  
 262 side effects as the reason. A big number of the HCWs mentioned the pill burden as a reason  
 263 69(28.9%). The HCWs that thought TPT had no benefits in high burden setting were 3(1.3%).

264 Finally, the Table 8: HCW Scores in the supplementary data shows the HCW variables  
 265 association with the KAP score. Among the variables, the significant association was found  
 266 between KAP scores and Sex, Department, Trained. Males had a higher pass rate than females

267 although there were more females enrolled in the study. Among the various departments, all  
 268 staff 4 (100%) from the TB clinic passed the KAP while the lowest pass rate came from the  
 269 MCH department at 22 (57.9%) followed by IPD 48 (64.9%) and ART 23 (85.2%).

270 *Table 8: HCW Scores*

| Variable                  | n=238 | Failed |         | Passed |        | P-Value |
|---------------------------|-------|--------|---------|--------|--------|---------|
|                           |       | n=59   | %       | n=179  | %      |         |
| <b>Age group</b>          |       |        |         |        |        |         |
| Under 30                  | 151   | 36     | 23.8%   | 115    | 76.2%  | 0.791   |
| 31-40                     | 61    | 17     | 27.9%   | 44     | 72.1%  |         |
| 41-50                     | 17    | 4      | 23.5%   | 13     | 76.5%  |         |
| Over 50                   | 7     | 1      | 14.3%   | 6      | 85.7%  |         |
| Unknown                   | 2     | 1      | 50.0%   | 1      | 50.0%  |         |
| <b>Sex</b>                |       |        |         |        |        |         |
| Male                      | 66    | 10     | 15.2%   | 56     | 84.9%  | 0.033*  |
| Female                    | 172   | 49     | 28.49-% | 123    | 71.5%  |         |
| <b>Department</b>         |       |        |         |        |        |         |
| Outpatient dept.          | 93    | 13     | 14.0%   | 80     | 86.0%  | 0.002*  |
| ART                       | 27    | 4      | 14.8%   | 23     | 85.2%  |         |
| IPD                       | 74    | 26     | 35.1%   | 48     | 64.9%  |         |
| MCH                       | 38    | 16     | 42.1%   | 22     | 57.9%  |         |
| TB                        | 4     | 0      | 0.0%    | 4      | 100.0% |         |
| VMMC                      | 1     | 0      | 0.0%    | 1      | 100.0% |         |
| Unknown                   | 1     | 0      | 0.0%    | 1      | 100.0% |         |
| <b>Duration employed</b>  |       |        |         |        |        |         |
| Less than 1 year          | 110   | 29     | 26.4%   | 81     | 73.6%  | 0.554   |
| Between 1-3 years         | 92    | 19     | 20.7%   | 73     | 79.4%  |         |
| Between 3-5 years         | 12    | 3      | 25.0%   | 9      | 75.0%  |         |
| Between 5-10 years        | 15    | 6      | 40.0%   | 9      | 60.0%  |         |
| More than 10 years        | 9     | 2      | 22.2%   | 7      | 77.8%  |         |
| <b>Ever trained on TB</b> |       |        |         |        |        |         |
| No                        | 134   | 42     | 31.3%   | 92     | 68.7%  | 0.005*  |
| Yes                       | 100   | 15     | 15.0%   | 85     | 85.0%  |         |
| Unknown                   | 4     | 2      | 50.0%   | 2      | 50.0%  |         |
| <b>Childhood TB</b>       |       |        |         |        |        |         |
| No                        | 65    | 13     | 20.0%   | 52     | 80.0%  | 0.048*  |
| Yes                       | 35    | 2      | 5.7%    | 33     | 94.3%  |         |

271 \*p-value < 0.05

272 Expectedly, those who had received prior TB training had a higher pass rate 85 (85%) than  
 273 those who had not 92 (68.7%) with those who received childhood TB training having even a  
 274 higher pass rate of 33 (94.3%) compared to those who did not 52 (80%). Furthermore, the study

275 shows that majority of the study participants passed 179 (75.2%) the KAP score out of the 238  
276 total study participants.

## 277 **Discussion**

278 A characterization of the HCW was done based on several factors. A substantial proportion  
279 had been in employment for less than 3 years and less than 50% reported ever being trained on  
280 TB and only 35% of those trained reported being trained on childhood TB. The low proportion  
281 reporting being trained on childhood TB could in part explain the low case detection of  
282 childhood TB that has been observed; Zambia has a huge gap in childhood TB case detection.

283 There is a considerable risk of infection for healthcare professionals, particularly nurses. Many  
284 infections can be avoided by following infection control procedures. (14, 17) This is especially  
285 key for HCWs working in a high burden TB environment because it is a highly infectious  
286 airborne disease. Our study found that a small proportion of HCW (29% of those trained)  
287 overall had previously been trained on infection control. Low infection control awareness  
288 among HCW is concerning because healthcare institutions can be prime locations for the  
289 transmission of tuberculosis (18).

290 The study found a significant association between TB infection control knowledge and the  
291 department where a HCW works. Staff from OPD, ART, and MCH had less understanding of  
292 TB infection control than those who did, and there were more individuals who did not respond  
293 to TB infection control questions than those who did. Despite the small number of participants  
294 from the TB clinic, health care professionals in the TB department had superior knowledge and  
295 attitudes towards TB expectedly. Healthcare workers' understanding of routine actions that can  
296 lead to TB transmission was limited to coughing.

297 Majority of HCW from ART department showed poor Infection Control knowledge. This is of  
298 particular concern in view of the high-risk patients that are seen in HIV clinics. Poor infection

299 control knowledge means that there could be a lot of nosocomial transmission in these settings.  
300 Repeated and targeted infection control training should be done frequently to improve the  
301 knowledge of staff in all departments.

302 Knowledge of extrapulmonary tuberculosis (ETB) and other routes of TB transmission  
303 (sneezing, singing, and laughing) should be improved. This will help improve tuberculosis  
304 Case finding and management of patients. The identification of novel markers for high and  
305 low risk persons in terms of TB development and treatment adequacy would enable for  
306 evidence-based decisions about who to treat, how to treat, and for how long to treat for both  
307 prevention and cure.

308 While HCWs from other departments (OPD, ART, and MCH) showed a good degree of  
309 knowledge of TB symptoms and a desire to participate in TB activities, there is still a need to  
310 increase the engagement of HCWs from other departments (OPD, ART, and MCH) in TB  
311 evaluation. In addition, the TB program must invest more in educating HCWs outside of the  
312 TB clinic. This is similar to recommendations made by An et al “*further investments and efforts*  
313 *should be considered to translate knowledge into action to ensure that children with*  
314 *presumptive TB will be duly screened, detected, and treated in low TB case detection ODs to*  
315 *improve childhood TB detection in Cambodia*” (19)

316 Although referring children to the TB clinic is the standard practice for HCWs who are not  
317 mainly in charge of TB treatment, which 73.1% of HCWs do, 55.5% of them claimed they also  
318 help collect sputum samples before referring the kids to further TB services. Therefore, it is  
319 essential that these healthcare workers receive infection control training because they are likely  
320 to contract TB themselves.

321 The study showed that there are varied knowledge levels based on the gender, department and  
322 training history of the healthcare workers. Consequently, there is need to improve the TB

323 knowledge, attitudes and practices of the female health care workers as they make up majority  
324 of the staff in TB diagnosis and treatment. Additionally, there is need to include staff from  
325 other departments that are not directly responsible for TB treatment as trainings about TB are  
326 being conducted. This was shown in the study where all HCWs from the TB clinic 4 (100%)  
327 passed the KAP while departments like IPD and ART only scored a pass rate of 22 (57.9%)  
328 and 48 (64.9%) respectively. However, the OPD had a good score at 80 (86.0%) indicating that  
329 there is good KAP in the main departments involved in TB diagnosis with the study further  
330 showing that staff with prior TB specific training have significantly high KAP scores at 33  
331 (94.3%) compared to those who did not have prior TB training 52 (80.0%).

### 332 **Strengths of the study**

333 A total of 238 HCWs were targeted and all of them were enrolled into the study, bringing the  
334 study to 100% response rate and all subjects were included in the analysis. Our study was a  
335 random sample of the population and we used the recommended KAP survey adapted from the  
336 sample questionnaire on KAP studies on TB by WHO and StopTBP Partnership (20).

### 337 **Limitations**

338 The study was conducted in Lusaka Urban communities and may not be representative of the  
339 population of Zambia although it does share similar features with other urban and peri-urban  
340 communities., and the knowledge attitudes and practices differ between urban and rural  
341 settings. Future studies should look at recruiting participants from multiple settings. We might  
342 have experienced some unintended selection bias in the health care workers enrolled in the  
343 study as some of the departments had shift workers that may not have been present at the time  
344 the questionnaires were being administered.

345 The other limitation is that the analysis was not done to compare the setting before intervention  
346 and after.

348 **Declarations**

349 **Ethics approval** was obtained from the University of Zambia Biomedical and Research Ethics  
350 Committee (IRB Reference number 635-2020).

351 **Availability of Data and materials** upon request from as per Data sharing policies of the  
352 institution.

353 CONFLICT OF INTEREST

354 We the authors declare that we are free of any conflict of interest.

355 FUNDING

356 The Stop TB Partnership/ TB REACH mechanism with funding support from the Government  
357 of Canada ( TB REACH wave 7)

358 AUTHORS CONTRIBUTIONS

359 Study Conceptualization: Mary Kagujje, Data collection Brian Shuma, Lophina Chilukutu,  
360 Sarah Nyangu

361 Data curation: data analysis Minyoi Maimbolwa, Paul Kaumba

362 Script write-up: data interpretation and revisions were done by Paul Kaumba, Mary Kagujje,  
363 Sarah Nyangu, Monde Muyoyeta, Nsala Sanjase,

364 All authors have reviewed the manuscript and agree to publish it.

365 ACKNOWLEDGEMENTS

366 The authors would like to thank the following for their support and contributions:

367 The staff from the chest clinic/TB corners at Chawama first level hospital and Kanyama first  
368 level hospital.

369 TB treatment supporters in all health facilities.



370 The Lusaka district health office for creating a good working environment for the study team

371 in the health facilities.

372

373 **References**

- 374 1. WHO. GLOBAL TB REPORT. 2021.
- 375 2. Dodd PJ, Yuen CM, Sismanidis C, Seddon JA, Jenkins HE. The global burden of  
376 tuberculosis mortality in children: a mathematical modelling study. *The Lancet Global health*.  
377 2017;5(9):e898-e906.
- 378 3. Partnership S. 2020.
- 379 4. Reuter A, Hughes J, Furin J. Challenges and controversies in childhood tuberculosis.  
380 *The Lancet*. 2019;394(10202):967-78.
- 381 5. Kissou SA, Millogo JDC, Nikiema Z, Birba E, Cessouma R, Sanogo B, et al. Childhood  
382 Tuberculosis in Sub-saharan Africa. *International Journal of Pediatrics & Neonatal Care*.  
383 2018;4.
- 384 6. Bashorun AO, Linda C, Omoleke S, Kendall L, Donkor SD, Kinteh M-A, et al.  
385 Knowledge, attitude and practice towards tuberculosis in Gambia: a nation-wide cross-  
386 sectional survey. *BMC public health*. 2020;20(1):1-13.
- 387 7. Alotaibi B, Yassin Y, Mushi A, Maashi F, Thomas A, Mohamed G, et al. Tuberculosis  
388 knowledge, attitude and practice among healthcare workers during the 2016 Hajj. *PLoS One*.  
389 2019;14(1):e0210913.
- 390 8. Farhanah AW, Sarimah A, Jafri Malin A, Hasnan J, Siti Suraiya MN, Wan Mohd  
391 Zahiruddin Wan M, et al. Updates on knowledge, attitude and preventive practices on  
392 tuberculosis among healthcare workers. *Malaysian Journal of Medical Sciences*.  
393 2016;23(6):25-34.
- 394 9. Sima BT, Belachew T, Abebe F. Health care providers' knowledge, attitude and  
395 perceived stigma regarding tuberculosis in a pastoralist community in Ethiopia: a cross-  
396 sectional study. *BMC health services research*. 2019;19(1):1-11.

- 397 10. Shrestha A, Bhattarai D, Thapa B, Basel P, Wagle RR. Health care workers'  
398 knowledge, attitudes and practices on tuberculosis infection control, Nepal. BMC Infectious  
399 Diseases. 2017;17(1):1-7.
- 400 11. Noé A, Ribeiro RM, Anselmo R, Maixenchs M, Sitole L, Munguambe K, et al.  
401 Knowledge, attitudes and practices regarding tuberculosis care among health workers in  
402 Southern Mozambique. BMC pulmonary medicine. 2017;17(1):1-7.
- 403 12. Minnery M, Contreras C, Pérez R, Solórzano N, Tintaya K, Jimenez J, et al. A cross  
404 sectional study of knowledge and attitudes towards tuberculosis amongst front-line  
405 tuberculosis personnel in high burden areas of Lima, Peru. PLoS One. 2013;8(9):e75698.
- 406 13. Marais B, Graham S, Cotton M, Beyers N. Diagnostic and management challenges for  
407 childhood tuberculosis in the era of HIV. The Journal of infectious diseases.  
408 2007;196(Supplement\_1):S76-S85.
- 409 14. WHO. Guidelines for the Management of Latent Tuberculosis Infection. 2020.
- 410 15. Keïta M, Camara AY, Traoré F, Camara ME, Kpanamou A, Camara S, et al. Impact of  
411 infection prevention and control training on health facilities during the Ebola virus disease  
412 outbreak in Guinea. BMC Public Health. 2018;18(1):1-7.
- 413 16. Organization WH. Advocacy, communication and social mobilization for TB control:  
414 a guide to developing knowledge, attitude and practice surveys. World Health Organization;  
415 2008. Report No.: 9241596171.
- 416 17. Joshi R, Reingold AL, Menzies D, Pai M. Tuberculosis among Health-Care Workers  
417 in Low- and Middle-Income Countries: A Systematic Review. PLOS Medicine.  
418 2006;3(12):e494.
- 419 18. Xie Z, Zhou N, Chi Y, Huang G, Wang J, Gao H, et al. Nosocomial tuberculosis  
420 transmission from 2006 to 2018 in Beijing Chest Hospital, China. Antimicrobial resistance and  
421 infection control. 2020;9(1):165.

- 422 19. An Y, Teo AKJ, Huot CY, Tieng S, Khun KE, Pheng SH, et al. Knowledge, attitude,  
423 and practices regarding childhood tuberculosis detection and management among health care  
424 providers in Cambodia: a cross-sectional study. *BMC Infectious Diseases*. 2022;22(1):1-11.
- 425 20. WHO. A guide to developing knowledge, attitude and practice surveys. 2008.
